# Supplementary material
Source: publisher figshare collection journal article supplement (https://acs.figshare.com/ndownloader/files/4720786)
Supplement: Supplementary file 1 [file 4720786]

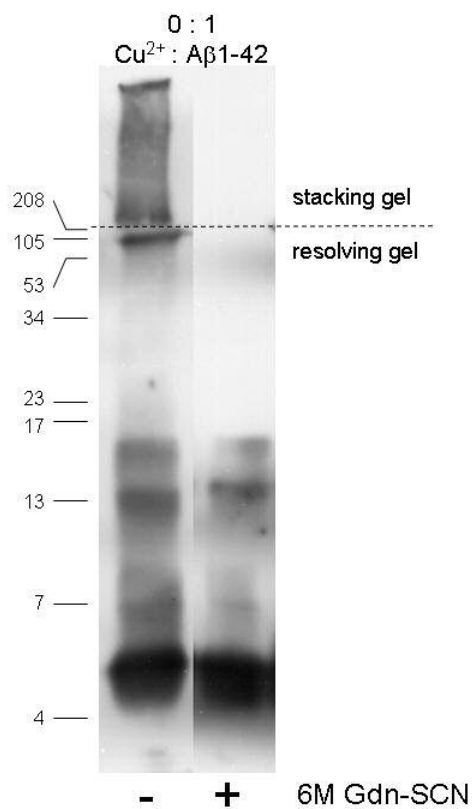

### Supplementary Figure 1

Analysis of Aβ1-42 amyloid-like aggregates prepared in the absence of Cu<sup>2+</sup>. Lane 1 (-): pelleted Aβ1-42 amyloid-like aggregates. Lane 2 (+): Aβ1-42 amyloid-like aggregates dissociated using 6 M guanidine thiocyanate. The resulting oligomers were separated by SDS-PAGE and visualized by western blot analysis.

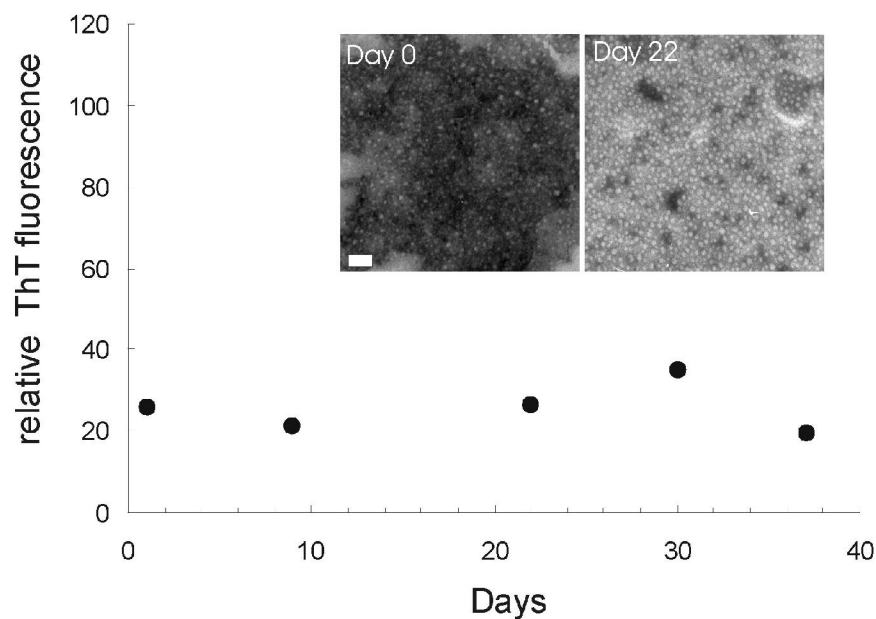

### Supplementary Figure 2

Long term growth of Aβ1-42 at 10 μM a Cu<sup>2+</sup>:peptide molar ratio of 2.5:1. (●) Samples where incubated at 37 °C with agitation at 200 rpm, ThT analysis was then carried out of the over a period of 37 days. The signal is normalized to Aβ1-42 fibrils prepared in the absence of Cu<sup>2+</sup>. EM images taken at day 0 and day 22, Scale bar, 100 nm data are representative of 3 separate experiments.
